# Supplementary material
Source: PubMed Central journal article supplement (PMC8895409)
Supplement: NIHMS1779598-supplement-ac0c03107_si_001.pdf [file NIHMS1779598-supplement-ac0c03107_si_001.pdf]

1 **Supporting Information**

2

3 **Development and Comparative Evaluation of Endolysosomal**  
4 **Proximity Labeling-based Proteomic Methods in Human iPSC-**  
5 **derived Neurons.**

6

7 Ashley M. Frankenfield<sup>1</sup>, Michael S. Fernandopulle<sup>2</sup>, Saadia Hasan<sup>2</sup>, Michael E. Ward<sup>2</sup>, Ling Hao<sup>1\*</sup>

8 <sup>1</sup>Department of Chemistry, The George Washington University, Science and Engineering Hall 4000, 800  
9 22<sup>nd</sup> St., NW, Washington, DC, 20052, USA;

10 <sup>2</sup>National Institute of Neurological Disorders and Stroke, NIH, Bldg 35-2A, 35 Convent Dr. Bethesda,  
11 MD, 20892, USA;

12

13

14 \*Corresponding author

15 Ling Hao

16 Assistant Professor of Chemistry

17 Tel.: +1 (202) 994-4492

18 E-mail: [linghao@gwu.edu](mailto:linghao@gwu.edu)

## 19 **TABLE OF CONTENTS**

- 20 • Supplemental Methods: Development of LAMP1-APEX iPSC lines
- 21 • Figure S1. Fluorescence imaging of APEX activity in overexpression KuD-LAMP1-APEX and
- 22 cytosolic NES-APEX iPSC-derived neurons.
- 23 • Figure S2. Distribution of peptide charges and precursor masses with different amount of
- 24 proteases for on-beads protein digestion
- 25 • Figure S3: Scatter plots showing reproducibility between biological replicates in the same batch
- 26 of APEX labeling experiment before and after normalization to PCCA.
- 27 • Figure S4. Evaluation of false discoveries in KuB-LAMP1-APEX using different control dataset.
- 28 • Figure S5. Beads titration assay for overexpressed APEX probes: KuB-LAMP1-APEX, KuD-
- 29 LAMP1-APEX, and cytosolic NES-APEX.
- 30 • Figure S6. Venn diagram of all identified proteins from all APEX probes and controls.
- 31 • Table S1. Interference peptide exclusion list
- 32 • Table S2. Whole cell lysate protein list for H<sub>2</sub>O<sub>2</sub> vs. PB vs. Ctrl groups (for Figure 6A)
- 33 • Table S3. Protein IDs from all APEX-proteomic datasets
- 34 • Table S4. Known lysosomal protein coverage in three LAMP1-APEX probes
- 35
- 36

## Supplemental Methods: Development of LAMP1-APEX iPSC lines

For the endogenous KI-LAMP1-APEX line, iPSCs were engineered by CRISPR-mediated homologous recombination of the APEX2 transgene into the endogenous LAMP1 gene. APEX2 is the second generation of APEX with improved enzymatic activity.<sup>1</sup> We refer APEX2 as APEX in the paper for simplicity. Briefly, 1.5 million cells were seeded onto a 6-well dish for reverse transfection with Lipofectamine Stem (ThermoFisher). A ribonucleoprotein particle containing a crRNA targeting the 3' end of the LAMP1 ORF, tracrRNA, and recombinant Cas9 protein, was co-transfected with a custom DNA plasmid harboring 1-kb homology fragments flanking the APEX gene and a fluorescent selection cassette (Genewiz). The following day, the cells were dissociated onto a 10 cm dish, and maintained on Essential 8 medium for one week. Genomic DNA was collected from the unpurified cells using a Quick-DNA Microprep Kit (Zymo) and endogenous integration of APEX2 at the 3' end of a single LAMP1 ORF allele was confirmed by PCR. When the cultures reached an 80-90% confluency, a FACS Sony SH800S Cell Sorter was used to seed a 96-well plate with individual fluorescent cells, and scaled to 6-well dishes.

Two overexpression lines, KuD-LAMP1-APEX and KuB-LAMP1-APEX were generated to compare with the endogenous KI-LAMP1-APEX line. The HA line was generated by TALEN-mediated integration of a tetracycline-inducible KuD-LAMP1-APEX transgene at the CLYBL gene (UNIPROT: Q8N0X4). Since the high expression level of the TET-On promoter may drive partial mislocalization of LAMP1 to the cell membrane, we used a detuning strategy of upstream open reading frames (uORFs) to decrease transcriptional efficiency and enable more physiologic expression levels of LAMP1-APEX. Our previously developed LAMP1-APEX employed the moderate Kozak/uORF detuning strategy “KuB” (CAAATGGGTTGAACC-start).<sup>2,3</sup> Compared to the KuB line, KuD line employed the stringent Kozak/uORF “KuD” (GGGATGGGTTGATTT-start). KuB is predicted to reduce expression from the TET-ON promoter driving LAMP1-APEX to <15% of a consensus Kozak sequence (GCCACC-start), whereas KuD is predicted to reduce expression to <2% of the consensus sequence. The successful integration of APEX onto the LAMP1 locus was confirmed by PCR for each transgenic iPSC line.

63

### Supplemental Figures:

64

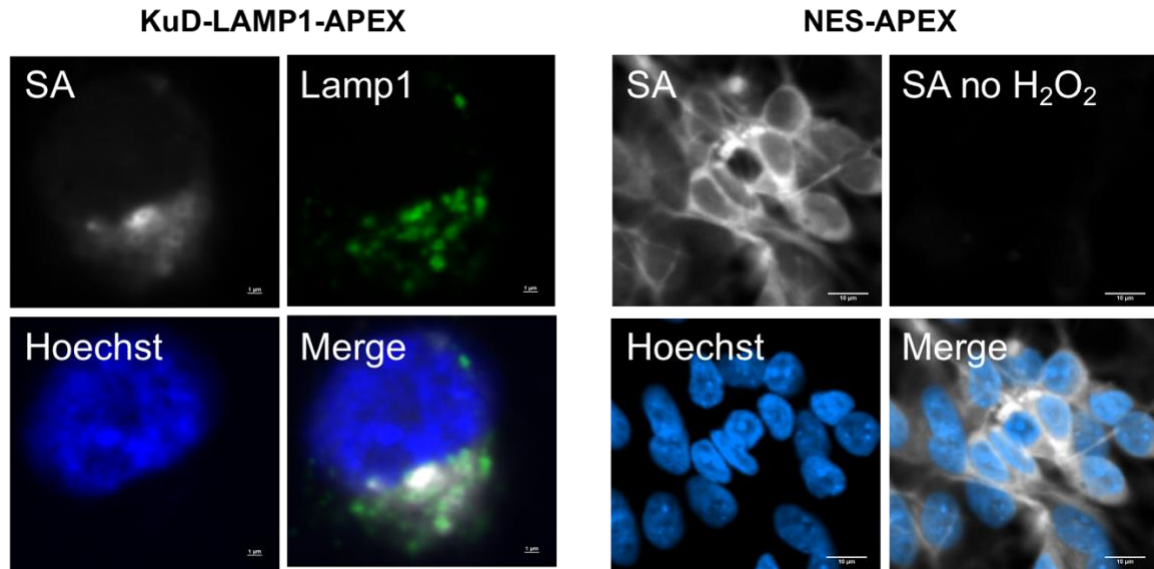

65

66 **Figure S1. Fluorescence imaging of APEX activity in overexpression KuD-LAMP1-APEX neurons**  
67 **(left) and cytosolic NES-APEX neurons (right).** Biotinylation is visualized by staining against  
68 streptavidin (SA) Fluor 680 (far red). Hoechst is a nuclear marker (blue). LAMP1 (green) is used as an  
69 endolysosome marker. Control neurons without H<sub>2</sub>O<sub>2</sub> treatment exhibit no biotinylation signals. The APEX  
70 activity of the KuB-LAMP1-APEX probe was shown in our previous publication.<sup>3</sup>

71

72

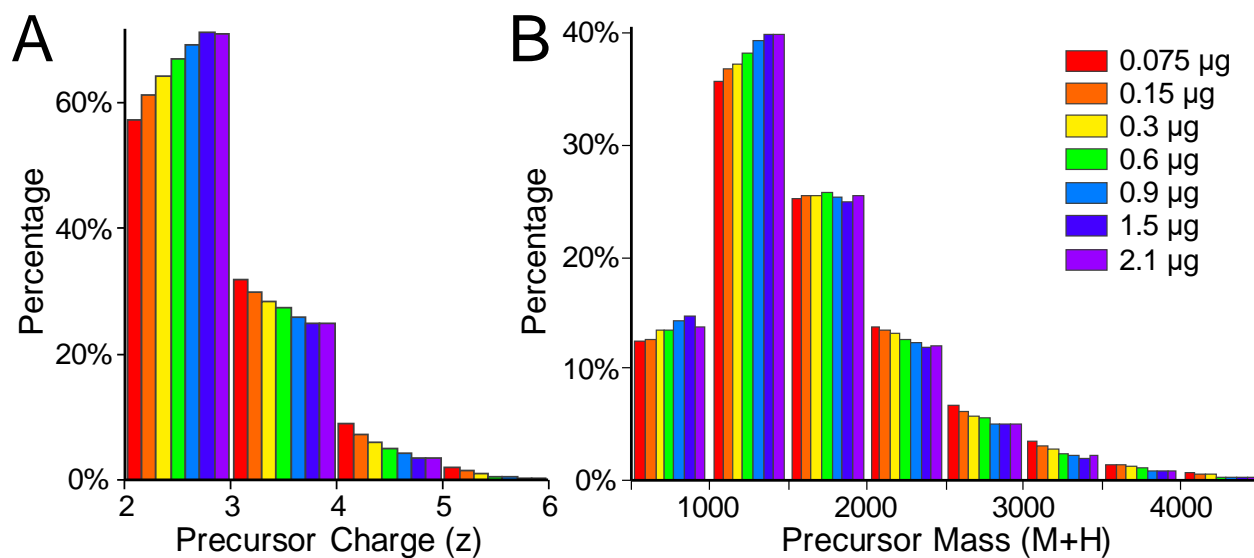

73  
74

75 **Figure S2. Distribution of peptide charges (A) and precursor masses (B) with different amount of**  
76 **proteases for on-beads protein digestion.** Increased amount of protease (Trypsin/LysC mix) shifted the  
77 peptides towards lower charges and smaller precursor masses.

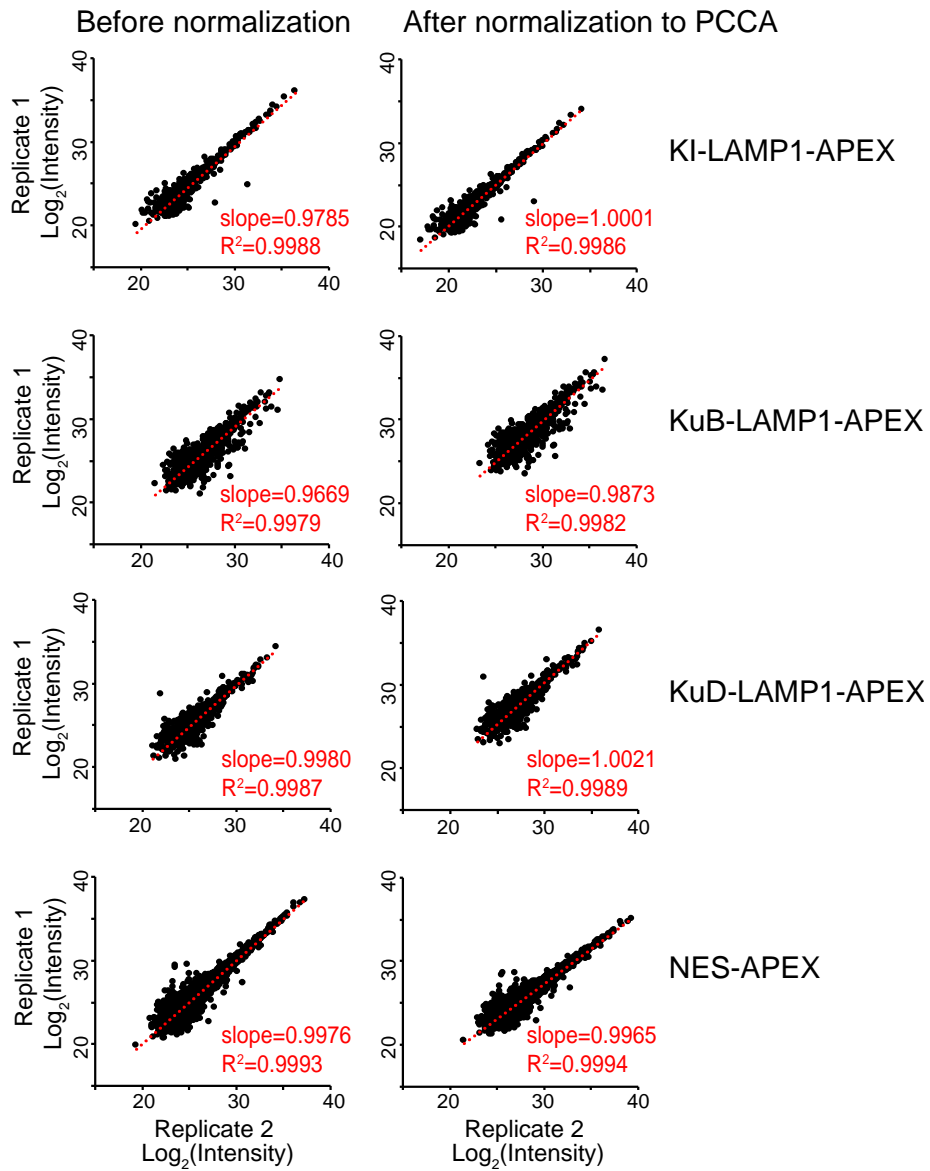

78

79 **Figure S3: Scatter plots showing reproducibility between biological replicates in the same batch of**  
 80 **APEX labeling experiment before and after normalization to PCCA.**

81

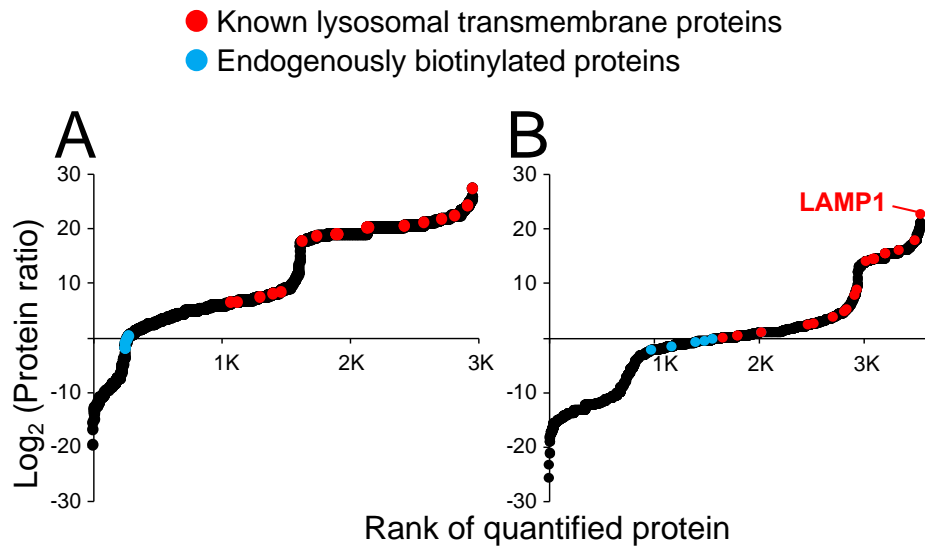

82  
83

84 **Figure S4. Evaluation of false discoveries in KuB-LAMP1-APEX using different control dataset.**

85 (A) KuB-LAMP1-APEX Proteomics with no-APEX line as control; (B) KuB-LAMP1-APEX with NES-  
86 APEX as control. Protein intensities were normalized to the most abundant endogenously biotinylated  
87 protein, PCCA.

88

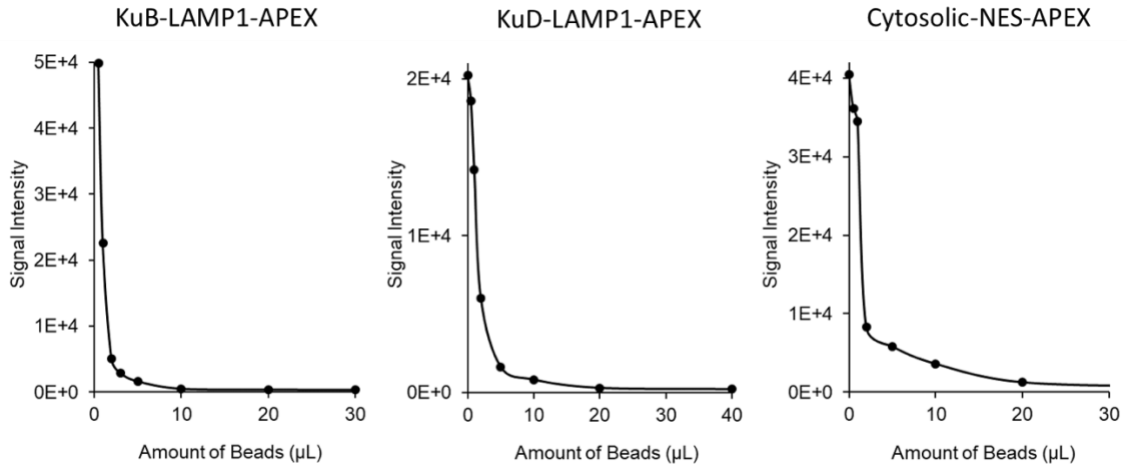

89

90 **Figure S5. Beads titration assay for overexpression APEX probes: KuB-LAMP1-APEX, KuD-**  
 91 **LAMP1-APEX, and cytosolic NES-APEX.** Increasing amount of beads were incubated with 20 μg of  
 92 input protein lysate in different tubes, followed by dot-blot assay against streptavidin staining.

93



94

95

96

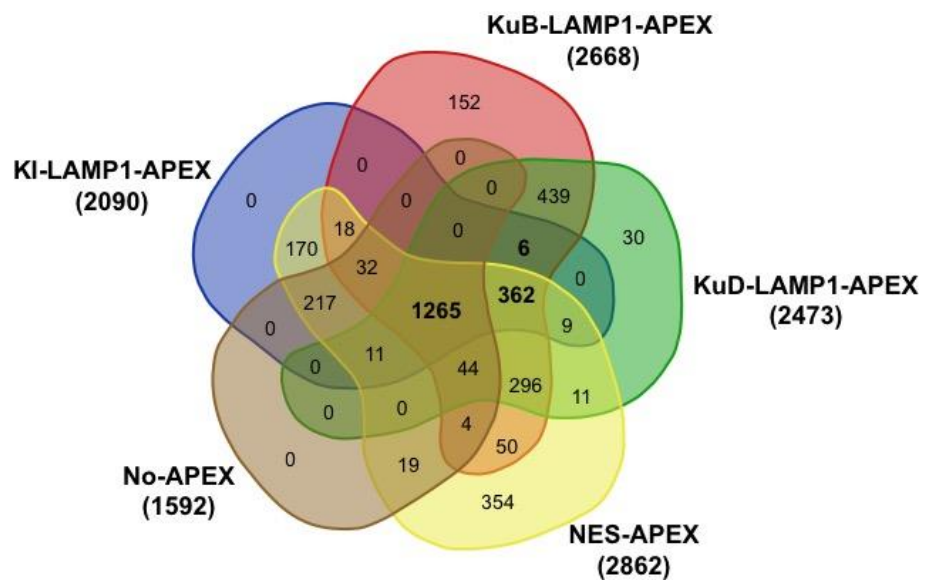

97

98

99 **Figure S6. Venn diagram of all identified proteins from all APEX probes and controls. Three**

100 LAMP1-APEX proteomics, cytosolic NES-APEX, and No-APEX control groups.

101

102  
103  
104  
105  
106  
107  
108  
109  
110  
111  
112  
113  
114  
115  
116

### Reference for Supporting Information

- (1) Lam, S. S.; Martell, J. D.; Kamer, K. J.; Deerinck, T. J.; Ellisman, M. H.; Mootha, V. K.; Ting, A. Y. Directed Evolution of APEX2 for Electron Microscopy and Proximity Labeling. *Nat. Methods* **2014**. <https://doi.org/10.1038/nmeth.3179>.
- (2) Liao, Y. C.; Fernandopulle, M. S.; Wang, G.; Choi, H.; Hao, L.; Drerup, C. M.; Patel, R.; Qamar, S.; Nixon-Abell, J.; Shen, Y.; Meadows, W.; Vendruscolo, M.; Knowles, T. P. J.; Nelson, M.; Czekalska, M. A.; Musteikyte, G.; Gachechiladze, M. A.; Stephens, C. A.; Pasolli, H. A.; Forrest, L. R.; St George-Hyslop, P.; Lippincott-Schwartz, J.; Ward, M. E. RNA Granules Hitchhike on Lysosomes for Long-Distance Transport, Using Annexin A11 as a Molecular Tether. *Cell* **2019**, *179* (1), 147-164.e20. <https://doi.org/10.1016/j.cell.2019.08.050>.
- (3) Fernandopulle, M. S.; Prestil, R.; Grunseich, C.; Wang, C.; Gan, L.; Ward, M. E. Transcription Factor–Mediated Differentiation of Human iPSCs into Neurons. *Curr. Protoc. Cell Biol.* **2018**, *79* (1), 1–48. <https://doi.org/10.1002/cpcb.51>.
